# Supplementary material for: Cell-type specific mechanical response and myosin dynamics during retinal lens development in Drosophila
Source: bioRxiv or medRxiv preprint supplement (doi:10.1101/558593), 2020-03-19

Supplementary Figure 1: Estimating the contraction/relaxation state of retinal cells.

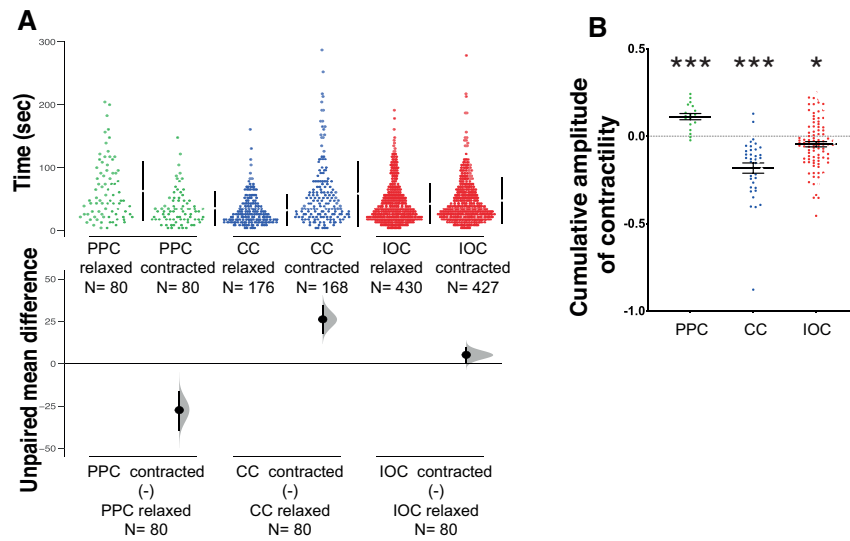

Supplement: Supplementary file [file media-1.pdf]
