# Supplementary material for: Cell-type specific mechanical response and myosin dynamics during retinal lens development in Drosophila
Source: bioRxiv or medRxiv preprint supplement (doi:10.1101/558593), 2020-03-19

## Supplementary Figure 2: Intrinsic area fluctuations and cell responses to ablation

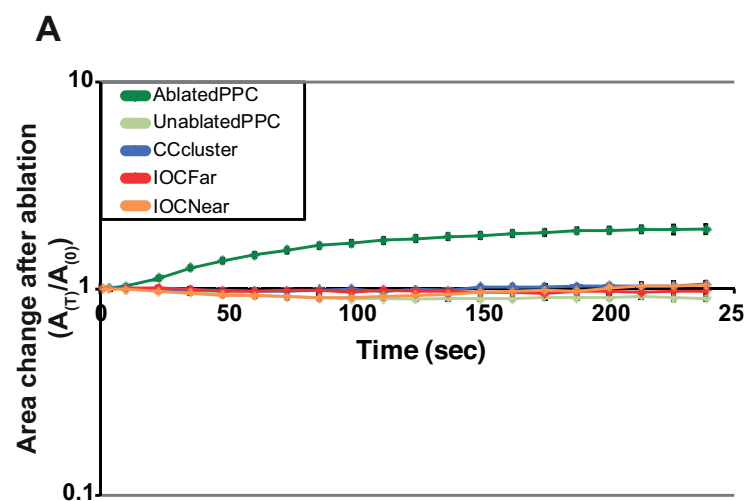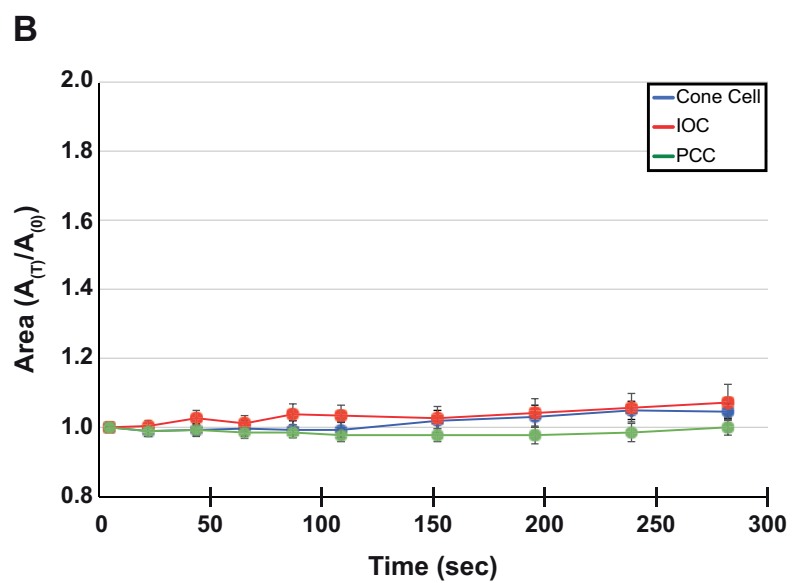

Supplement: Supplementary file [file media-2.pdf]
