# Supplementary material for: Cell-type specific mechanical response and myosin dynamics during retinal lens development in Drosophila
Source: bioRxiv or medRxiv preprint supplement (doi:10.1101/558593), 2020-03-19

Supplementary Figure 3: *sds22<sup>IR</sup>* does not affect the AJ pool of MyoII

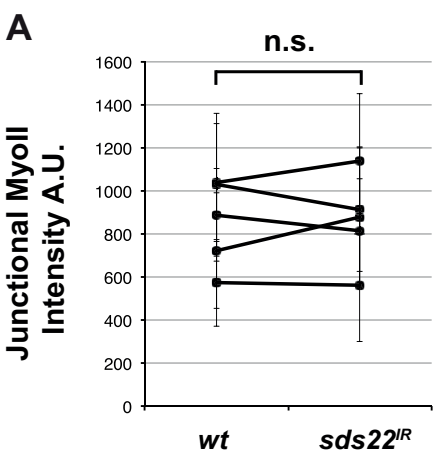

Supplement: Supplementary file [file media-3.pdf]
