# Supplementary material for: Cell-type specific mechanical response and myosin dynamics during retinal lens development in Drosophila
Source: bioRxiv or medRxiv preprint supplement (doi:10.1101/558593), 2020-03-19

Supplementary Figure 4: Changes in cell area depend upon the actomyosin cytoskeleton

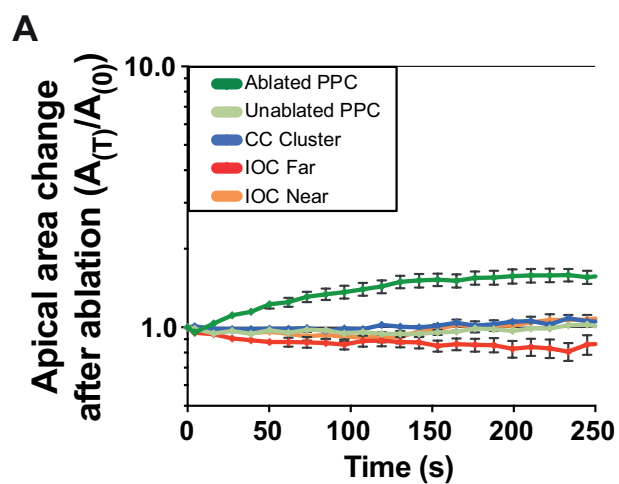

Supplement: Supplementary file [file media-4.pdf]
